# Supplementary material for: Constructing imine groups on the surface of Cu1/Pd(111) as a novel strategy for CO2 hydrogenation to methanol
Source: Royal Society of Chemistry journal article supplement (doi:10.1039/d2nr05874j), 2023-01-01
Supplement: d2nr05874j1.pdf [file d2nr05874j1.pdf]

## **Constructing imine groups on the surface of Cu<sub>1</sub>/Pd(111) as a novel strategy for CO<sub>2</sub> hydrogenation to methanol**

Sanmei Wang,<sup>a,b</sup> Qi Li,<sup>a</sup> Yue Xin,<sup>a</sup> Sunpei Hu,<sup>b</sup> Xiaoxi Guo,<sup>a</sup> Yong Zhang,<sup>c</sup> Ling Zhang,<sup>d</sup> Bingang Chen,<sup>\*d</sup>  
Wenhua Zhang,<sup>\*b</sup> Liangbing Wang<sup>\*a</sup>

<sup>a</sup> *State Key Laboratory for Powder Metallurgy, School of Materials Science and Engineering, Central South University, Changsha, Hunan 410083*

<sup>b</sup> *Hefei National Laboratory for Physical Sciences at the Microscale and Synergetic Innovation Centre of Quantum Information & Quantum Physics, University of Science and Technology of China, Hefei, Anhui 230026*

<sup>c</sup> *Qinghai Oilfield New Energy Division, Dunhuang, Gansu, 736202*

<sup>d</sup> *Ningbo Fengcheng Advanced Energy Materials Research Institute Co., Ltd., Fenghua District, Ningbo, Zhejiang, 315500*

The calculation details for the catalytic activity of Cu(111), Pd<sub>3</sub>Cu<sub>6</sub>, Pd<sub>6</sub>Cu<sub>3</sub>, Pd-ML, and Pd(111) for CO<sub>2</sub> hydrogenation to CH<sub>3</sub>OH

The structures of the Cu(111), Pd<sub>3</sub>Cu<sub>6</sub>, Pd<sub>6</sub>Cu<sub>3</sub>, and Pd-ML in Fig. 1a were obtained from ref.32. The size for the Cu(111), Pd<sub>3</sub>Cu<sub>6</sub>, Pd<sub>6</sub>Cu<sub>3</sub>, and Pd-ML structure were four-layer slabs with (3×3) unit cells (Fig. S1†). Ref. 32 showed that the rate-determining step for CO<sub>2</sub> hydrogenation to CH<sub>3</sub>OH over Cu(111), Pd<sub>3</sub>Cu<sub>6</sub>, Pd<sub>6</sub>Cu<sub>3</sub> were the hydrogenation of CO<sub>2</sub> to COOH. For Pd-ML, the the rate-determining step was the O-O bond breaking of the COOH intermediates. To increase the comparability and reduce the computational cost, we recalculated the rate-determining step energy barrier using the parameters of the computational method. Thus, all structures in Fig. 1a were calculated using the same method. The free energy profiles for CO<sub>2</sub> hydrogenation to CH<sub>3</sub>OH over Pd(111) was shown in Fig. S2†.

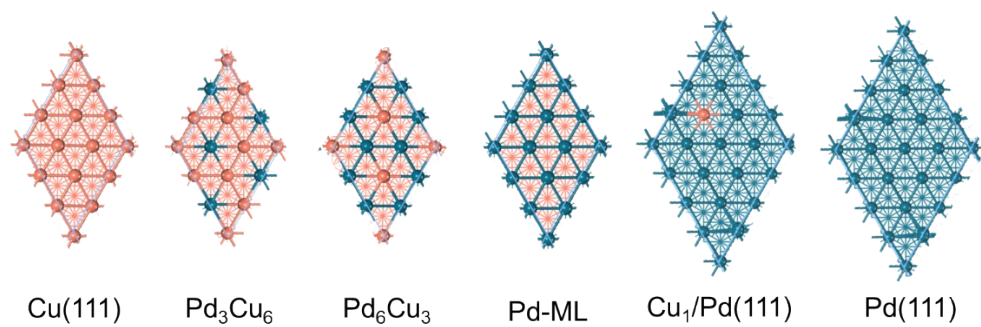

Fig. S1 The various Pd-Cu structures. The cyan and yellow spheres represented Pd and Cu atoms, respectively.

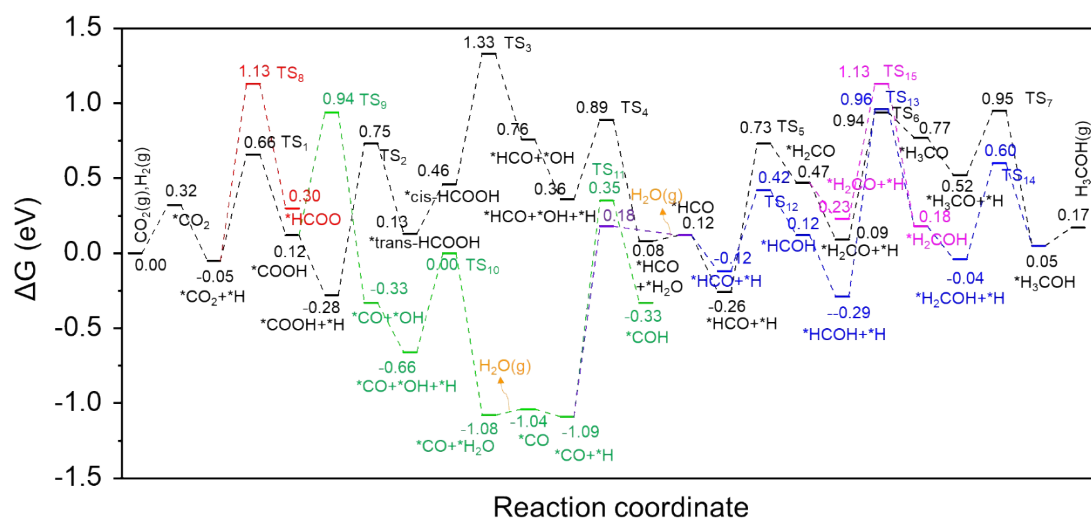

Fig. S2 The free energy profiles for CO<sub>2</sub> hydrogenation to CH<sub>3</sub>OH over Pd(111). The black route was the most possible reaction pathway for CO<sub>2</sub> hydrogenation to CH<sub>3</sub>OH over Pd(111). TS represented the transition state.

## The possible adsorption configuration for CO<sub>2</sub> on C<sub>3</sub>H<sub>4</sub>O@NH<sub>2</sub>-Cu<sub>1</sub>/Pd(111)

We established a large number of structures to detect whether CO<sub>2</sub> tended to be adsorbed via the interaction between the C of CO<sub>2</sub> and the N of imine groups. The calculation results indicated that CO<sub>2</sub> was difficult to interact with amine groups on NH<sub>2</sub>-Cu<sub>1</sub>/Pd(111), C<sub>2</sub>H<sub>4</sub>O@NH<sub>2</sub>-Cu<sub>1</sub>/Pd(111), and C<sub>3</sub>H<sub>6</sub>O@NH<sub>2</sub>-Cu<sub>1</sub>/Pd(111) due to steric hindrances. Nevertheless, for C<sub>3</sub>H<sub>4</sub>O@NH<sub>2</sub>-Cu<sub>1</sub>/Pd(111), CO<sub>2</sub> was able to chemically adsorb on amines by its C atoms bonded to N of amine groups (Fig.S3a†). The adsorption energy of CO<sub>2</sub> in this configuration was -0.22 eV, which was close to that of CO<sub>2</sub> completely adsorbed on Pd atoms (-0.20 eV) (Fig.S3b†). In addition, the adsorption configurations where C and O of CO<sub>2</sub> were bonded to N of amine groups and Pd atoms, respectively, were also considered. Fig.S3c† illustrated that the adsorption energy of CO<sub>2</sub> in this configuration was -0.27 eV, which was still close to that of CO<sub>2</sub> completely adsorbed on Pd atoms (-0.20 eV). The results indicated that the N atoms of imines and the Pd atoms next to the imines were possible adsorption sites for CO<sub>2</sub>. Nevertheless, CO<sub>2</sub> adsorbed entirely on Pd was more conducive to its binding with H to generate CH<sub>3</sub>OH than CO<sub>2</sub> adsorbed on imines. Thus, the most optimal adsorption configuration for CO<sub>2</sub> hydrogenation to CH<sub>3</sub>OH on C<sub>3</sub>H<sub>4</sub>O@NH<sub>2</sub>-Cu<sub>1</sub>/Pd(111) was CO<sub>2</sub> adsorbed entirely on Pd atoms.

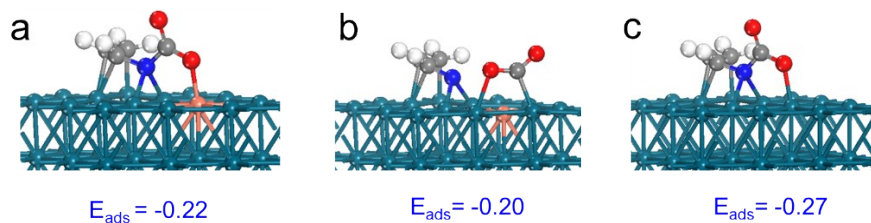

Fig. S3 The possible adsorption configuration of CO<sub>2</sub> on C<sub>3</sub>H<sub>4</sub>O@NH<sub>2</sub>-Cu<sub>1</sub>/Pd(111). The cyan, grey, white, blue, red, and yellow spheres represented Pd, C, H, N, O, and Cu atoms,

respectively.

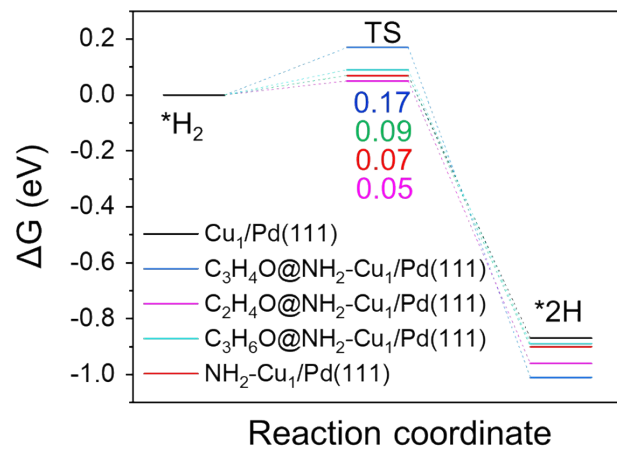

Fig. S4 The dissociation of H<sub>2</sub> on various structures. TS represented the transition state.

Table S1 The free energy barriers (eV) of elementary steps for CO<sub>2</sub> hydrogenation to CH<sub>3</sub>OH over Cu<sub>1</sub>/Pd(111), NH<sub>2</sub>-Cu<sub>1</sub>/Pd(111), C<sub>2</sub>H<sub>4</sub>O@NH<sub>2</sub>-Cu<sub>1</sub>/Pd(111), C<sub>3</sub>H<sub>4</sub>O@NH<sub>2</sub>-Cu<sub>1</sub>/Pd(111), and C<sub>3</sub>H<sub>6</sub>O@NH<sub>2</sub>-Cu<sub>1</sub>/Pd(111).

| No.             | Reactions                                      | Cu <sub>1</sub> /<br>Pd(111) | NH <sub>2</sub> -<br>Cu <sub>1</sub> /<br>Pd(111) | C <sub>2</sub> H <sub>4</sub> O@<br>NH <sub>2</sub> -Cu <sub>1</sub> /<br>Pd(111) | C <sub>3</sub> H <sub>4</sub> O<br>@NH <sub>2</sub> -<br>Cu <sub>1</sub> /<br>Pd(111) | C <sub>3</sub> H <sub>6</sub> O<br>@NH <sub>2</sub> -<br>Cu <sub>1</sub> /<br>Pd(111) |
|-----------------|------------------------------------------------|------------------------------|---------------------------------------------------|-----------------------------------------------------------------------------------|---------------------------------------------------------------------------------------|---------------------------------------------------------------------------------------|
| R <sub>1</sub>  | CO <sub>2</sub> *+*H→*COOH                     | 0.63                         | 0.59                                              | 0.59                                                                              | 0.56                                                                                  | 0.56                                                                                  |
| R <sub>2</sub>  | CO <sub>2</sub> *+*H→*HCOO                     | 0.76                         | 0.74                                              | 0.76                                                                              | 0.90                                                                                  | 0.80                                                                                  |
| R <sub>3</sub>  | *COOH→*CO+*OH                                  | 1.42                         | 1.47                                              | 0.72                                                                              | 0.80                                                                                  | 0.80                                                                                  |
| R <sub>4</sub>  | *CO+*OH+*H→*CO+<br>*H <sub>2</sub> O           | 0.60                         | 0.64                                              | 0.53                                                                              | 0.95                                                                                  | 0.61                                                                                  |
| R <sub>5</sub>  | *CO+*H→*COH                                    | 1.86                         | 1.43                                              | 1.52                                                                              | 1.41                                                                                  | 1.40                                                                                  |
| R <sub>6</sub>  | *CO+*H→*HCO                                    | 1.95                         | 1.15                                              | 1.20                                                                              | 1.35                                                                                  | 1.24                                                                                  |
| R <sub>7</sub>  | *COOH+*H→*trans-<br>HCOOH                      | 1.00                         | 0.88                                              | 0.78                                                                              | 0.62                                                                                  | 0.86                                                                                  |
| R <sub>8</sub>  | *trans-HCOOH→*cis-<br>HCOOH                    | 0.81                         | 0.55                                              | 0.59                                                                              | 0.60                                                                                  | 0.74                                                                                  |
| R <sub>9</sub>  | *cis-<br>HCOOH→*HCO+*OH                        | 0.62                         | 0.47                                              | 0.43                                                                              | 0.62                                                                                  | 0.74                                                                                  |
| R <sub>10</sub> | *HCO+*OH+*H→*H<br>CO+*H <sub>2</sub> O         | 0.74                         | 0.80                                              | 0.47                                                                              | 0.48                                                                                  | 0.69                                                                                  |
| R <sub>11</sub> | *HCO+*H→*HCOH                                  | 0.60                         | 0.57                                              | 0.54                                                                              | 0.66                                                                                  | 0.78                                                                                  |
| R <sub>12</sub> | *HCOH+*H→*H <sub>2</sub> CO<br>H               | 1.48                         | 0.72                                              | 1.03                                                                              | 0.65                                                                                  | 0.82                                                                                  |
| R <sub>13</sub> | *H <sub>2</sub> COH+*H→*H <sub>3</sub> CO<br>H | 0.70                         | 0.74                                              | 0.62                                                                              | 0.61                                                                                  | 0.71                                                                                  |
| R <sub>14</sub> | *HCO+*H→*H <sub>2</sub> CO                     | 0.90                         | 1.01                                              | 0.79                                                                              | 0.83                                                                                  | 0.68                                                                                  |
| R <sub>15</sub> | *H <sub>2</sub> CO+*H→*H <sub>2</sub> COH      | 1.32                         | 0.81                                              | 0.89                                                                              | 0.45                                                                                  | 0.84                                                                                  |
| R <sub>16</sub> | *H <sub>2</sub> CO+*H→*H <sub>3</sub> CO       | 0.72                         | 0.75                                              | 0.78                                                                              | 0.82                                                                                  | 0.62                                                                                  |
| R <sub>17</sub> | *H <sub>3</sub> CO+*H→*H <sub>3</sub> COH      | 0.29                         | 0.30                                              | 0.55                                                                              | 0.36                                                                                  | 0.26                                                                                  |

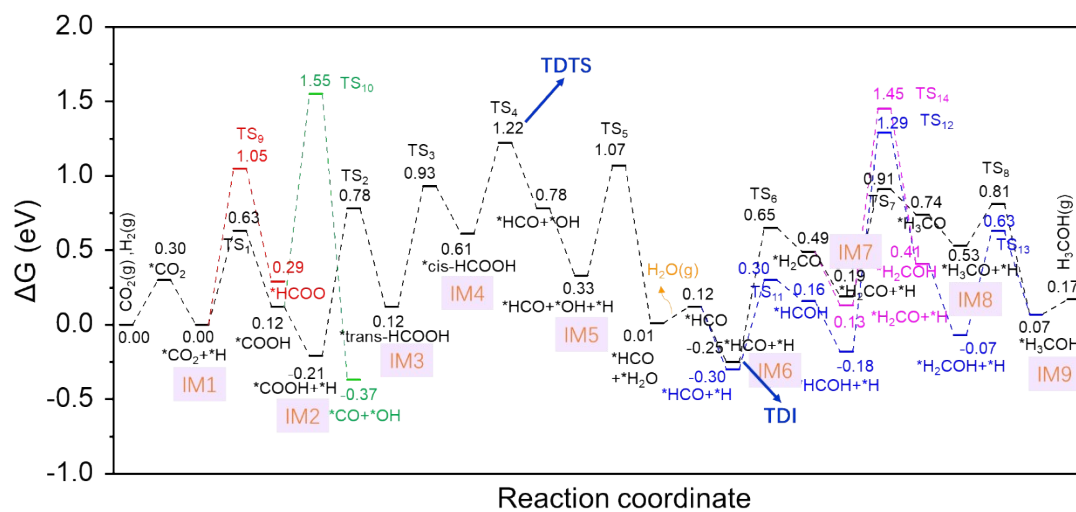

Fig. S5 The free energy profiles for CO<sub>2</sub> hydrogenation to CH<sub>3</sub>OH over Cu<sub>1</sub>/Pd(111). The black route was the most possible reaction pathway for CO<sub>2</sub> hydrogenation to CH<sub>3</sub>OH over Cu<sub>1</sub>/Pd(111). TS represented the transition state. IM represented the intermediates used to calculate the X<sub>TOF</sub>.



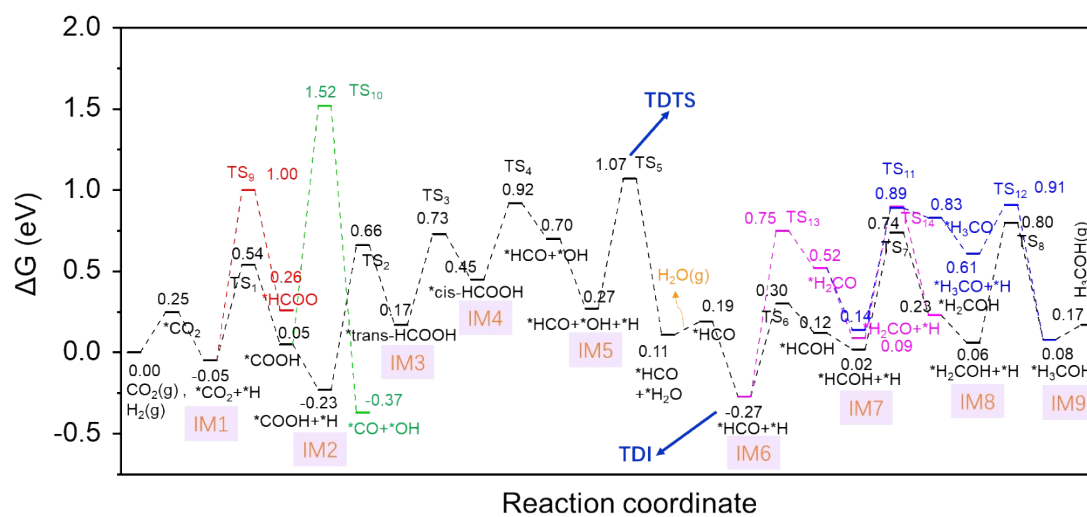

Fig. S6 The free energy profiles for CO<sub>2</sub> hydrogenation to CH<sub>3</sub>OH over NH<sub>2</sub>-Cu<sub>1</sub>/Pd(111). The black route was the most possible reaction pathway for CO<sub>2</sub> hydrogenation to CH<sub>3</sub>OH over NH<sub>2</sub>-Cu<sub>1</sub>/Pd(111). TS represented the transition state. IM represented the intermediates used to calculate the X<sub>TOF</sub>.

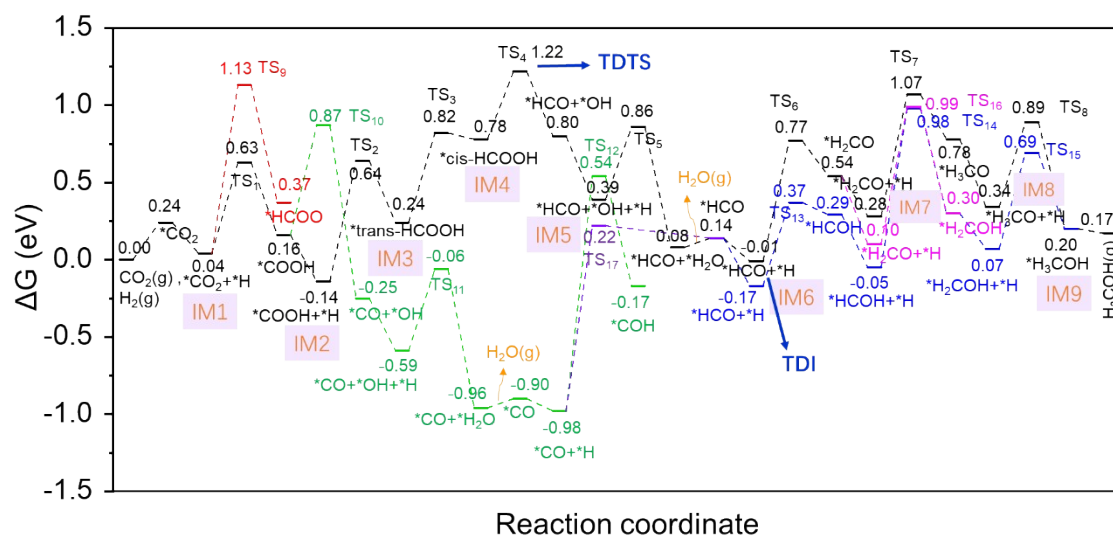

Fig. S7 The free energy profiles for CO<sub>2</sub> hydrogenation to CH<sub>3</sub>OH over C<sub>2</sub>H<sub>4</sub>O@NH<sub>2</sub>-Cu<sub>1</sub>/Pd(111). The black route was the most possible reaction pathway for CO<sub>2</sub> hydrogenation to CH<sub>3</sub>OH over C<sub>2</sub>H<sub>4</sub>O@NH<sub>2</sub>-Cu<sub>1</sub>/Pd(111). TS represented the transition state. IM represented the intermediates used to calculate the X<sub>TOF</sub>.

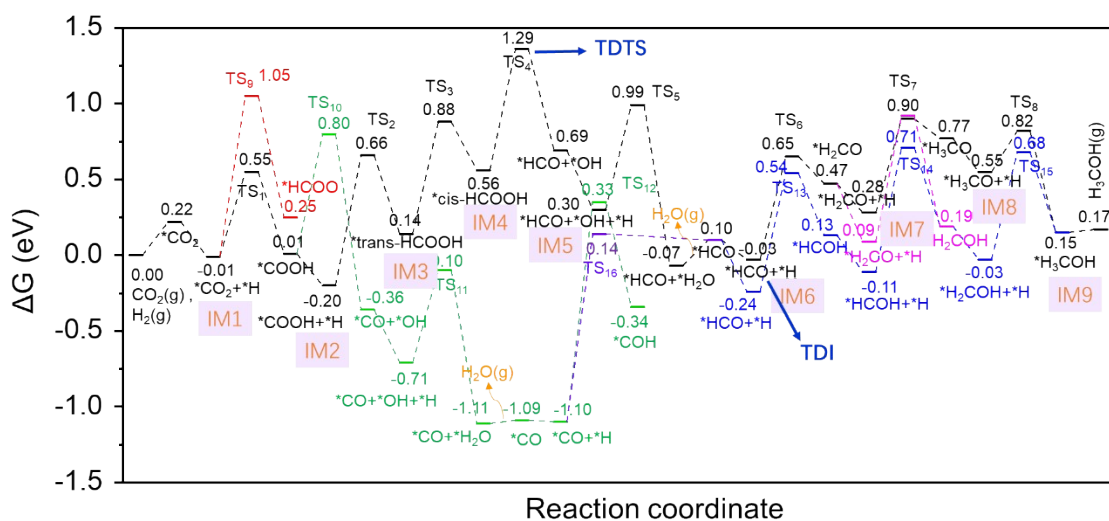

Fig. S8 The energy profiles for  $\text{CO}_2$  hydrogenation to  $\text{CH}_3\text{OH}$  over  $\text{C}_3\text{H}_6\text{O}@\text{NH}_2\text{-Cu}_1/\text{Pd}(111)$ . The black route was the most possible reaction pathway for  $\text{CO}_2$  hydrogenation to  $\text{CH}_3\text{OH}$  over  $\text{C}_3\text{H}_6\text{O}@\text{NH}_2\text{-Cu}_1/\text{Pd}(111)$ . TS represented the transition state. IM represented the intermediates used to calculate the  $X_{\text{TOF}}$ .

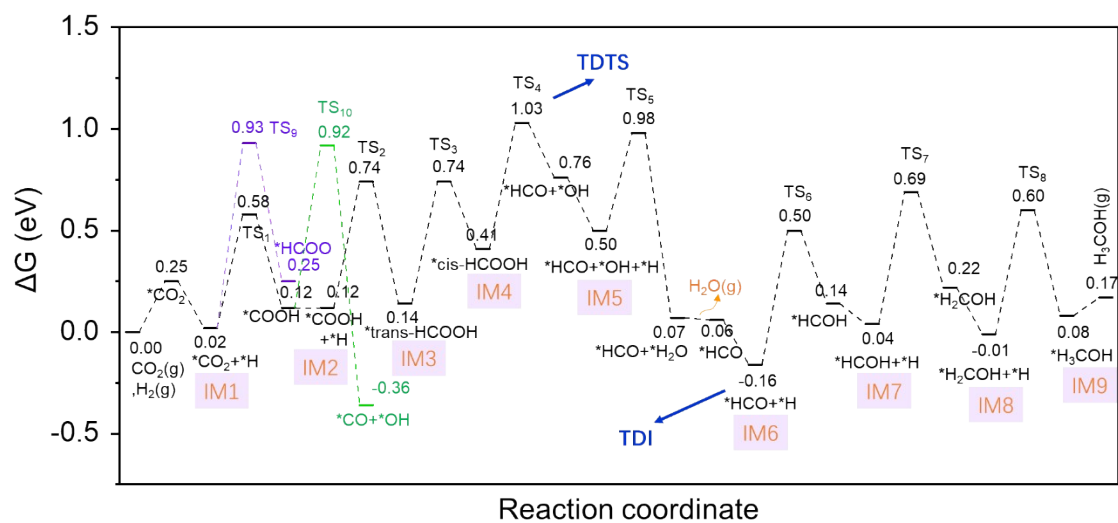

Fig. S9 The free energy profiles for CO<sub>2</sub> hydrogenation to CH<sub>3</sub>OH over C<sub>3</sub>H<sub>4</sub>O@NH<sub>2</sub>-Cu<sub>1</sub>/Pd(111). IM represented the intermediates used to calculate the X<sub>TOF</sub>.

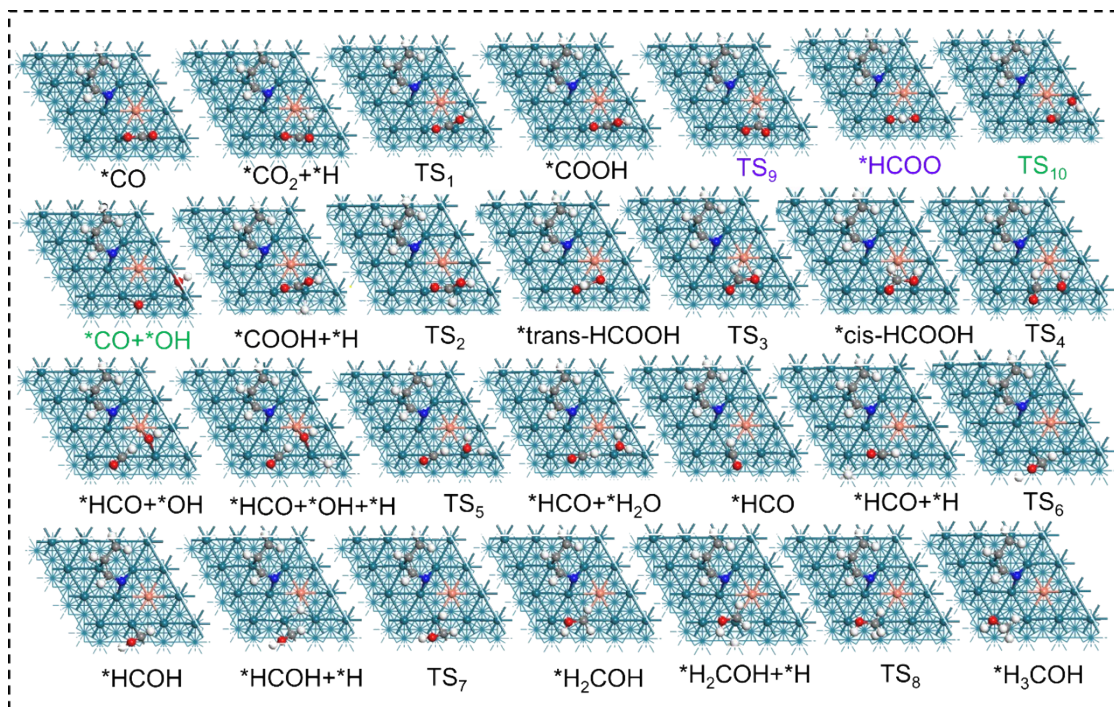

Fig. S10 The structures of intermediates in the hydrogenation of  $\text{CO}_2$  to  $\text{CH}_3\text{OH}$  on  $\text{C}_3\text{H}_4\text{O}@\text{NH}_2\text{-Cu}_1/\text{Pd}(111)$ . The cyan, grey, white, blue, red, and yellow spheres represented Pd, C, H, N, O, and Cu atoms, respectively.

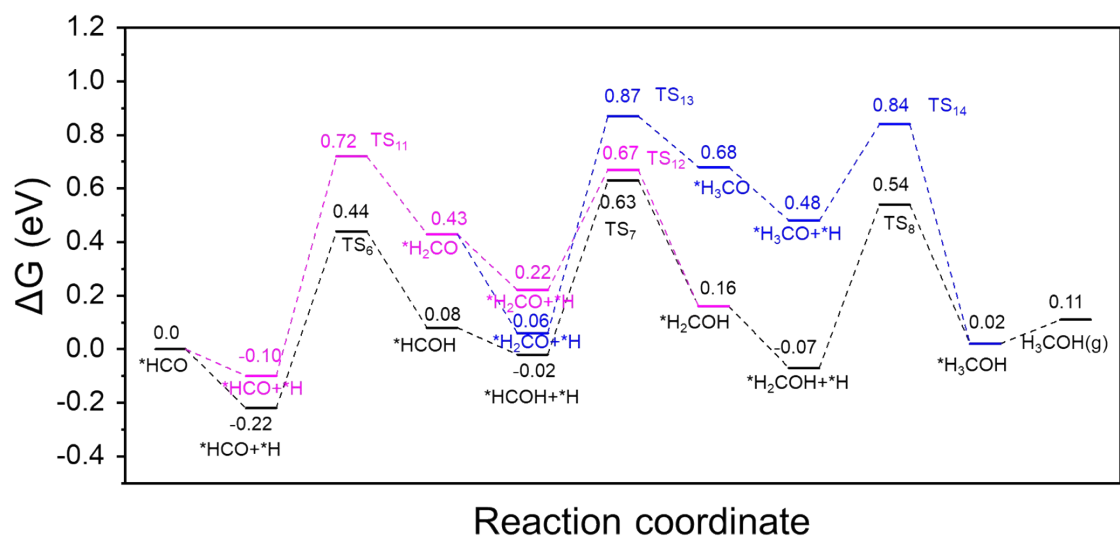

Fig. S11 The possible reaction paths from HCO intermediates hydrogenation to CH<sub>3</sub>OH over C<sub>3</sub>H<sub>4</sub>O@NH<sub>2</sub>-Cu<sub>1</sub>/Pd(111).

## Energetic span model

The energetic span model proposed by Kozuch<sup>S1-S2</sup> were used to estimate turnover frequency (TOF). Energetic span model theory suggested that the energy span ( $\delta E$ ) determined the reaction rate in the catalytic cycle of multi-element steps, rather than the step with the highest activation energy.  $\delta E$  can be obtained by TOF-determining intermediate (TDI) and TOF-determining transition state (TDTS). The Gibbs free energy difference of the total reaction was named as  $\Delta G_r$ . When  $\Delta G_r < 0$ , the approximate relation between TOF and energy span  $\delta E$  can be simplified to

$$TOF = \frac{k_B T}{h} \exp\left(-\frac{\delta E}{RT}\right) \quad (1)$$

$$\delta E = \begin{cases} T_{TDTS} - I_{TDI} & \text{if TDTS appears after TDI} \\ T_{TDTS} - I_{TDI} + \Delta G_r & \text{if TDTS appears before TDI} \end{cases} \quad (2)$$

Where  $K_B$  is Boltzmann constant,  $T$  is temperature, and  $R$  is the ideal gas constant. To locate the determining states, we can calculate the degree of TOF control for transition states and intermediates ( $X_{TOF,T}$  and  $X_{TOF,I}$ ). The states with the highest  $X_{TOF}$  corresponded to the TDTS and TDI.<sup>S3</sup>

$$X_{TOF,T_i} = \frac{\sum_j \exp\left[-(T_i - I_j - \Delta G_{ij})/RT\right]}{\sum_i \sum_j \exp\left[-(T_i - I_j - \Delta G_{ij})/RT\right]} \quad (3)$$

$$X_{TOF,T_j} = \frac{\sum_i \exp\left[-(T_i - I_j - \Delta G_{ij})/RT\right]}{\sum_i \sum_j \exp\left[-(T_i - I_j - \Delta G_{ij})/RT\right]} \quad (4)$$

$$\Delta G_{ij} = \begin{cases} \Delta G_r, & i > j, \\ 0, & i \leq j. \end{cases}$$

Where  $I_i$  and  $T_i$  symbolized the standard-state Gibbs energies of the  $i$ th intermediate or transition state. The  $X_{TOF}$  of the  $i$ th intermediate and transition states on  $\text{Cu}_1/\text{Pd}(111)$ ,  $\text{NH}_2\text{-Cu}_1/\text{Pd}(111)$ ,  $\text{C}_2\text{H}_4\text{O@NH}_2\text{-Cu}_1/\text{Pd}(111)$ ,  $\text{C}_3\text{H}_4\text{O@NH}_2\text{-Cu}_1/\text{Pd}(111)$  and  $\text{C}_3\text{H}_6\text{O@NH}_2\text{-Cu}_1/\text{Pd}(111)$  were displayed in Table S2, Table S3, Table S4, Table S5, and Table S6,

respectively. We only considered the  $X_{\text{TOF}}$  of intermediates and transition states in the optimal pathway.  $X_{\text{TOF}}$  showed that for  $\text{NH}_2\text{-Cu}_1/\text{Pd}(111)$ , the TDI and TDTS were IM6 and  $\text{TS}_5$ , respectively. For  $\text{Cu}_1/\text{Pd}(111)$ ,  $\text{C}_2\text{H}_4\text{O@NH}_2\text{-Cu}_1/\text{Pd}(111)$ ,  $\text{C}_3\text{H}_4\text{O@NH}_2\text{-Cu}_1/\text{Pd}(111)$ ,  $\text{C}_3\text{H}_6\text{O@NH}_2\text{-Cu}_1/\text{Pd}(111)$ , the TDI and TDTS were IM6 and  $\text{TS}_4$ , respectively. It was noted that the  $X_{\text{TOF}}$  of IM2 and IM6 in  $\text{C}_3\text{H}_6\text{O@NH}_2\text{-Cu}_1/\text{Pd}(111)$  were the same. COOH intermediate hydrogenated to trans-HCOOH intermediate was endothermic 0.34 eV, while HCO intermediate hydrogenated to  $\text{H}_2\text{CO}$  intermediate was endothermic 0.50 eV. The result indicated that IM6 had a more significant effect on the whole reaction than IM2. Thus, we chose IM6 as the TDI for  $\text{CO}_2$  hydrogenation to  $\text{CH}_3\text{OH}$  on  $\text{C}_3\text{H}_6\text{O@NH}_2\text{-Cu}_1/\text{Pd}(111)$ . After TDI and TDTS were determined,  $\delta E$  can be calculated according to equation (2). The  $\delta E$  for  $\text{Cu}_1/\text{Pd}(111)$ ,  $\text{NH}_2\text{-Cu}_1/\text{Pd}(111)$ ,  $\text{C}_2\text{H}_4\text{O@NH}_2\text{-Cu}_1/\text{Pd}(111)$ ,  $\text{C}_3\text{H}_4\text{O@NH}_2\text{-Cu}_1/\text{Pd}(111)$ , and  $\text{C}_3\text{H}_6\text{O@NH}_2\text{-Cu}_1/\text{Pd}(111)$  were 1.47, 1.34, 1.23, 1.19, and 1.32 eV, respectively.



Table S2 The  $X_{\text{TOF}}$  of intermediates and transition states on  $\text{Cu}_1/\text{Pd}(111)$ .

|                       | IM1      | IM2      | IM3      | IM4      | IM5      | IM6      | IM7      | IM8      | IM9      | $X_{\text{TOF}}, T_i$ |
|-----------------------|----------|----------|----------|----------|----------|----------|----------|----------|----------|-----------------------|
| $T_1$                 | 3.34E+10 | 1.07E+14 | 3.30E+08 | 2.16E+00 | 1.03E+05 | 5.00E+14 | 2.24E+07 | 4.68E+01 | 2.26E+09 | 1.69E-10              |
| $T_2$                 | 1.55E+10 | 3.44E+16 | 1.06E+11 | 6.91E+02 | 3.29E+07 | 1.60E+17 | 7.16E+09 | 1.50E+04 | 7.24E+11 | 5.41E-08              |
| $T_3$                 | 4.95E+12 | 1.59E+16 | 3.39E+13 | 2.21E+05 | 1.05E+10 | 5.13E+19 | 2.29E+12 | 4.80E+06 | 2.32E+14 | 1.43E-05              |
| $T_4$                 | 3.46E+17 | 1.11E+21 | 3.42E+15 | 1.55E+10 | 7.35E+14 | 3.58E+24 | 1.60E+17 | 3.35E+11 | 1.62E+19 | 9.97E-01              |
| $T_5$                 | 1.08E+15 | 3.48E+18 | 1.07E+13 | 6.98E+04 | 2.29E+12 | 1.12E+22 | 5.00E+14 | 1.05E+09 | 5.05E+16 | 3.11E-03              |
| $T_6$                 | 1.04E+08 | 3.35E+11 | 1.03E+06 | 6.74E-03 | 3.20E+02 | 1.08E+15 | 4.83E+07 | 1.01E+02 | 4.88E+09 | 3.00E-10              |
| $T_7$                 | 2.29E+12 | 7.39E+15 | 2.27E+10 | 1.48E+02 | 7.05E+06 | 3.44E+16 | 1.06E+12 | 2.23E+06 | 1.07E+14 | 1.17E-08              |
| $T_8$                 | 4.90E+10 | 1.58E+14 | 4.85E+08 | 3.17E+00 | 1.51E+05 | 7.35E+14 | 3.29E+07 | 4.75E+04 | 2.29E+12 | 2.49E-10              |
| $X_{\text{TOF}}, I_j$ | 9.65E-08 | 3.11E-04 | 9.64E-10 | 4.30E-15 | 2.05E-10 | 1.00E+00 | 4.47E-08 | 9.35E-14 | 4.52E-06 |                       |

Table S3 The  $X_{\text{TOF}}$  of intermediates and transition states on  $\text{NH}_2\text{-Cu}_1/\text{Pd}(111)$ .

|                       | IM1      | IM2      | IM3      | IM4      | IM5      | IM6      | IM7      | IM8      | IM9      | $X_{\text{TOF}}, T_i$ |
|-----------------------|----------|----------|----------|----------|----------|----------|----------|----------|----------|-----------------------|
| $T_1$                 | 7.16E+09 | 7.27E+12 | 1.51E+06 | 3.19E+01 | 3.24E+04 | 3.39E+13 | 4.85E+08 | 1.04E+08 | 4.83E+07 | 1.70E-09              |
| $T_2$                 | 1.05E+09 | 7.35E+14 | 1.53E+08 | 3.22E+03 | 3.27E+06 | 3.42E+15 | 4.90E+10 | 1.05E+10 | 4.88E+09 | 1.72E-07              |
| $T_3$                 | 1.55E+10 | 1.57E+13 | 2.26E+09 | 4.75E+04 | 4.83E+07 | 5.05E+16 | 7.24E+11 | 1.55E+11 | 7.20E+10 | 2.09E-06              |
| $T_4$                 | 2.31E+13 | 2.34E+16 | 4.88E+09 | 7.09E+07 | 7.20E+10 | 7.54E+19 | 1.08E+15 | 2.32E+14 | 1.07E+14 | 3.11E-03              |
| $T_5$                 | 7.39E+15 | 7.50E+18 | 1.56E+12 | 3.29E+07 | 2.31E+13 | 2.41E+22 | 3.46E+17 | 7.42E+16 | 3.44E+16 | 9.97E-01              |
| $T_6$                 | 1.02E+03 | 1.03E+06 | 2.15E-01 | 4.52E-06 | 4.59E-03 | 3.32E+09 | 4.75E+04 | 1.02E+04 | 4.73E+03 | 1.37E-13              |
| $T_7$                 | 2.27E+10 | 2.31E+13 | 4.80E+06 | 1.01E+02 | 1.03E+05 | 1.07E+14 | 1.06E+12 | 2.28E+11 | 1.06E+11 | 5.44E-09              |
| $T_8$                 | 2.28E+11 | 2.32E+14 | 4.83E+07 | 1.02E+03 | 1.03E+06 | 1.08E+15 | 1.55E+10 | 2.29E+12 | 1.06E+12 | 5.43E-08              |
| $X_{\text{TOF}}, I_j$ | 3.06E-07 | 3.11E-04 | 6.48E-11 | 4.28E-15 | 9.55E-10 | 1.00E+00 | 1.43E-05 | 3.07E-06 | 1.42E-06 |                       |

Table S4 The  $X_{\text{TOF}}$  of intermediates and transition states on  $\text{C}_2\text{H}_4\text{O}@\text{NH}_2\text{-Cu}_1/\text{Pd}(111)$ .

|                       | IM1      | IM2      | IM3      | IM4      | IM5      | IM6      | IM7      | IM8      | IM9      | $X_{\text{TOF}}, T_i$ |
|-----------------------|----------|----------|----------|----------|----------|----------|----------|----------|----------|-----------------------|
| $T_1$                 | 7.16E+09 | 7.27E+12 | 3.27E+06 | 3.12E-03 | 1.02E+04 | 4.90E+10 | 7.02E+05 | 6.98E+04 | 1.52E+07 | 1.72E-08              |
| $T_2$                 | 1.52E+07 | 1.07E+13 | 4.80E+06 | 4.59E-03 | 1.50E+04 | 7.20E+10 | 1.03E+06 | 1.03E+05 | 2.24E+07 | 2.52E-08              |
| $T_3$                 | 1.55E+10 | 1.57E+13 | 4.88E+09 | 4.66E+00 | 1.52E+07 | 7.31E+13 | 1.05E+09 | 1.04E+08 | 2.27E+10 | 2.08E-07              |
| $T_4$                 | 7.42E+16 | 7.54E+19 | 3.39E+13 | 2.24E+07 | 7.31E+13 | 3.51E+20 | 5.03E+15 | 5.00E+14 | 1.09E+17 | 9.99E-01              |
| $T_5$                 | 7.20E+10 | 7.31E+13 | 3.29E+07 | 3.14E-02 | 7.09E+07 | 3.41E+14 | 4.88E+09 | 4.85E+08 | 1.06E+11 | 9.69E-07              |
| $T_6$                 | 2.26E+09 | 2.29E+12 | 1.03E+06 | 9.85E-04 | 3.22E+03 | 1.07E+13 | 1.53E+08 | 1.52E+07 | 3.32E+09 | 3.04E-08              |
| $T_7$                 | 2.32E+14 | 2.35E+17 | 1.06E+11 | 1.01E+02 | 3.30E+08 | 1.59E+15 | 1.57E+13 | 1.56E+12 | 3.41E+14 | 5.56E-04              |
| $T_8$                 | 2.28E+11 | 2.32E+14 | 1.04E+08 | 9.95E-02 | 3.25E+05 | 1.56E+12 | 2.24E+07 | 1.54E+09 | 3.35E+11 | 5.48E-07              |
| $X_{\text{TOF}}, I_j$ | 1.74E-04 | 1.77E-01 | 7.96E-08 | 5.24E-14 | 1.71E-07 | 8.22E-01 | 1.18E-05 | 1.18E-06 | 2.56E-04 |                       |

Table S5 The  $X_{\text{TOF}}$  of intermediates and transition states on  $\text{C}_3\text{H}_4\text{O}@\text{NH}_2\text{-Cu}_1/\text{Pd}(111)$ .

|                       | IM1      | IM2      | IM3      | IM4      | IM5      | IM6      | IM7      | IM8      | IM9      | $X_{\text{TOF}}, T_i$ |
|-----------------------|----------|----------|----------|----------|----------|----------|----------|----------|----------|-----------------------|
| $T_1$                 | 2.26E+09 | 4.83E+07 | 2.24E+07 | 6.91E+02 | 2.17E+01 | 2.29E+12 | 1.05E+09 | 7.16E+09 | 2.25E+08 | 2.66E-08              |
| $T_2$                 | 1.54E+09 | 2.27E+10 | 1.05E+10 | 3.25E+05 | 1.02E+04 | 1.08E+15 | 4.93E+11 | 3.37E+12 | 1.06E+11 | 1.25E-05              |
| $T_3$                 | 1.54E+09 | 3.29E+07 | 1.05E+10 | 3.25E+05 | 1.02E+04 | 1.08E+15 | 4.93E+11 | 3.37E+12 | 1.06E+11 | 1.25E-05              |
| $T_4$                 | 1.07E+14 | 2.29E+12 | 1.06E+12 | 2.27E+10 | 7.13E+08 | 7.54E+19 | 3.44E+16 | 2.35E+17 | 7.39E+15 | 8.72E-01              |
| $T_5$                 | 1.57E+13 | 3.35E+11 | 1.55E+11 | 4.80E+06 | 1.04E+08 | 1.10E+19 | 5.03E+15 | 3.44E+16 | 1.08E+15 | 1.28E-01              |
| $T_6$                 | 1.51E+05 | 3.22E+03 | 1.49E+03 | 4.61E-02 | 1.45E-03 | 1.06E+11 | 4.83E+07 | 3.30E+08 | 1.04E+07 | 1.22E-09              |
| $T_7$                 | 2.25E+08 | 4.80E+06 | 2.23E+06 | 6.88E+01 | 2.16E+00 | 2.28E+11 | 7.20E+10 | 4.93E+11 | 1.55E+10 | 9.32E-09              |
| $T_8$                 | 7.05E+06 | 1.51E+05 | 6.98E+04 | 2.16E+00 | 6.77E-02 | 7.16E+09 | 3.27E+06 | 1.55E+10 | 4.85E+08 | 2.67E-10              |
| $X_{\text{TOF}}, I_j$ | 1.42E-06 | 3.06E-08 | 1.43E-08 | 2.62E-10 | 9.42E-12 | 9.96E-01 | 4.55E-04 | 3.11E-03 | 9.76E-05 |                       |

Table S6 The  $X_{\text{TOF}}$  of intermediates and transition states on  $\text{C}_3\text{H}_6\text{O}@\text{NH}_2\text{-Cu}_1/\text{Pd}(111)$ .

|                       | IM1      | IM2      | IM3      | IM4      | IM5      | IM6      | IM7      | IM8      | IM9      | $X_{\text{TOF}}, T_i$ |
|-----------------------|----------|----------|----------|----------|----------|----------|----------|----------|----------|-----------------------|
| $T_1$                 | 2.26E+09 | 3.37E+12 | 7.05E+06 | 6.81E-01 | 1.50E+04 | 4.88E+09 | 3.24E+04 | 1.00E+00 | 4.80E+06 | 1.51E-10              |
| $T_2$                 | 2.25E+08 | 2.32E+14 | 4.85E+08 | 4.68E+01 | 1.03E+06 | 3.35E+11 | 2.23E+06 | 6.88E+01 | 3.30E+08 | 1.04E-08              |
| $T_3$                 | 1.06E+12 | 1.59E+15 | 2.29E+12 | 2.21E+05 | 4.88E+09 | 1.59E+15 | 1.05E+10 | 3.25E+05 | 1.56E+12 | 1.42E-07              |
| $T_4$                 | 7.50E+18 | 1.12E+22 | 2.34E+16 | 1.56E+12 | 3.44E+16 | 1.12E+22 | 7.42E+16 | 2.29E+12 | 1.10E+19 | 1.00E+00              |
| $T_5$                 | 7.31E+13 | 1.09E+17 | 2.28E+11 | 2.20E+04 | 3.35E+11 | 1.09E+17 | 7.24E+11 | 2.24E+07 | 1.07E+14 | 9.75E-06              |
| $T_6$                 | 1.53E+08 | 2.28E+11 | 4.78E+05 | 4.61E-02 | 1.02E+03 | 2.28E+11 | 1.51E+06 | 4.68E+01 | 2.25E+08 | 2.04E-11              |
| $T_7$                 | 2.29E+12 | 3.42E+15 | 7.16E+09 | 6.91E+02 | 1.52E+07 | 4.95E+12 | 2.27E+10 | 7.02E+05 | 3.37E+12 | 1.53E-07              |
| $T_8$                 | 1.06E+11 | 1.58E+14 | 3.30E+08 | 3.19E+01 | 7.02E+05 | 2.28E+11 | 1.51E+06 | 3.24E+04 | 1.55E+11 | 7.07E-09              |
| $X_{\text{TOF}}, I_j$ | 3.35E-04 | 5.00E-01 | 1.05E-06 | 6.97E-11 | 1.54E-06 | 5.00E-01 | 3.31E-06 | 1.02E-10 | 4.92E-04 |                       |

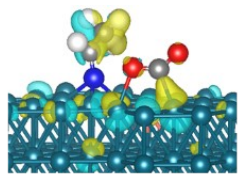

$C_2H_4O@NH_2-Cu_1/Pd(111)$

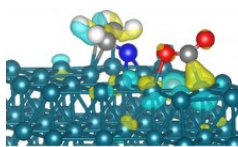

$C_3H_4O@NH_2-Cu_1/Pd(111)$

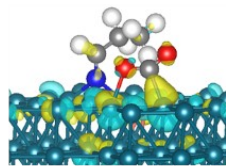

$C_3H_6O@NH_2-Cu_1/Pd(111)$

Fig. S12 The charge density difference for  $CO_2$  adsorbed on  $C_2H_4O@NH_2-Cu_1/Pd(111)$ ,  $C_3H_4O@NH_2-Cu_1/Pd(111)$ , and  $C_3H_6O@NH_2-Cu_1/Pd(111)$ . The isosurface value was set to  $0.02 e/\text{\AA}^3$ . The cyan, grey, white, blue, red, and yellow spheres represented Pd, C, H, N, O, and Cu atoms, respectively.

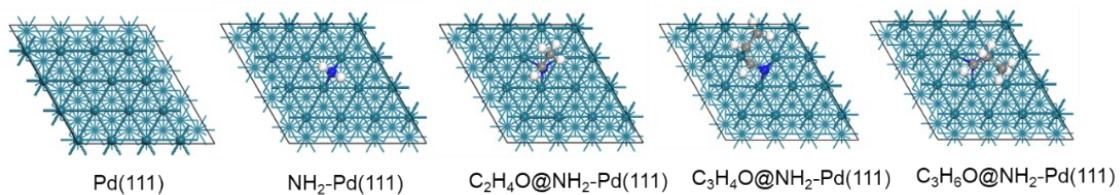

Fig. S13 After the Cu atoms in Cu<sub>1</sub>/Pd(111), NH<sub>2</sub>-Cu<sub>1</sub>/Pd(111), C<sub>2</sub>H<sub>4</sub>O@NH<sub>2</sub>-Cu<sub>1</sub>/Pd(111), C<sub>3</sub>H<sub>4</sub>O@NH<sub>2</sub>-Cu<sub>1</sub>/Pd(111) and C<sub>3</sub>H<sub>6</sub>O@NH<sub>2</sub>-Cu<sub>1</sub>/Pd(111) were replaced by Pd atoms, these structures are named as Pd(111), NH<sub>2</sub>-Pd(111), C<sub>2</sub>H<sub>4</sub>O@NH<sub>2</sub>-Pd(111), C<sub>3</sub>H<sub>4</sub>O@NH<sub>2</sub>-Pd(111) and C<sub>3</sub>H<sub>6</sub>O@NH<sub>2</sub>-Pd(111), respectively.

Table S7 The adsorption energy (eV) of CO<sub>2</sub>, groups, and H atoms on various structures.

ICOHP represented integrated crystal orbital Hamilton population.

| structures                                                                    | E <sub>ads</sub> (CO <sub>2</sub> ) | E <sub>ads</sub> (groups) | E <sub>ads</sub> (H) | ICOHP |
|-------------------------------------------------------------------------------|-------------------------------------|---------------------------|----------------------|-------|
| Pd(111)                                                                       | -0.11                               | —                         | -0.70                | -2.28 |
| Cu <sub>1</sub> /Pd(111)                                                      | -0.12                               | —                         | -0.62                | -2.33 |
| NH <sub>2</sub> -Pd(111)                                                      | -0.16                               | -2.67                     | -0.67                | -2.40 |
| NH <sub>2</sub> -Cu <sub>1</sub> /Pd(111)                                     | -0.19                               | -2.71                     | -0.61                | -2.46 |
| C <sub>2</sub> H <sub>4</sub> O@NH <sub>2</sub> -Pd(111)                      | -0.20                               | -2.64                     | -0.68                | -2.44 |
| C <sub>2</sub> H <sub>4</sub> O@NH <sub>2</sub> -<br>Cu <sub>1</sub> /Pd(111) | -0.22                               | -2.64                     | -0.62                | -2.47 |
| C <sub>3</sub> H <sub>4</sub> O@NH <sub>2</sub> -Pd(111)                      | -0.17                               | -3.34                     | -0.67                | -2.47 |
| C <sub>3</sub> H <sub>4</sub> O@NH <sub>2</sub> -<br>Cu <sub>1</sub> /Pd(111) | -0.20                               | -3.36                     | -0.62                | -2.51 |
| C <sub>3</sub> H <sub>6</sub> O@NH <sub>2</sub> -Pd(111)                      | -0.21                               | -2.75                     | -0.67                | -2.45 |
| C <sub>3</sub> H <sub>6</sub> O@NH <sub>2</sub> -<br>Cu <sub>1</sub> /Pd(111) | -0.24                               | -2.76                     | -0.62                | -2.49 |



Table S8 The energy barriers of the rate-determining steps for CO<sub>2</sub> hydrogenation to CH<sub>3</sub>OH over various catalysts.

| Catalysts                                                                 | Energy barriers (eV) | Free energy barriers (eV) | TOF(S <sup>-1</sup> ) | References       |
|---------------------------------------------------------------------------|----------------------|---------------------------|-----------------------|------------------|
| C <sub>3</sub> H <sub>4</sub> O@NH <sub>2</sub> -Cu <sub>1</sub> /Pd(111) | 0.72                 | 0.66                      | -8.24E <sup>-08</sup> | <i>This work</i> |
| ZnO/Cu(111)                                                               | 0.90                 | —                         | —                     | S4               |
| Ga <sub>3</sub> Ni <sub>5</sub> (111)                                     | 0.85                 | —                         | —                     | S5               |
| Zr <sub>3</sub> O <sub>6</sub> H <sub>6</sub> /Cu(111)                    | 1.36                 | —                         | —                     | S6               |
| SiC quantum dots                                                          | 1.36                 | —                         | —                     | S7               |
| In <sub>2</sub> O <sub>3</sub> (110)                                      | 1.14                 | —                         | —                     | S8               |
| Cu@Pd core-shell                                                          | 1.17                 | —                         | —                     | S9               |
| PdCu <sub>3</sub> (111)                                                   | 1.40                 | —                         | —                     | S10              |
| Pd <sub>3</sub> Cu <sub>6</sub>                                           | 1.43                 | —                         | —                     | S11              |
| Pd-ML                                                                     | 1.41                 | —                         | —                     | S11              |

Table S9 The number electrons gained by groups before ( $e_{\text{before}}$ ) and after CO<sub>2</sub> adsorption ( $e_{\text{after}}$ ). The difference in the number of electrons ( $\Delta e$ ) obtained by groups before and after CO<sub>2</sub> adsorption.

| Structures                                                                    | $e_{\text{before}}$ | $e_{\text{after}}$ | $\Delta e$ |
|-------------------------------------------------------------------------------|---------------------|--------------------|------------|
| NH <sub>2</sub> -Cu <sub>1</sub> /Pd(111)                                     | 0.16                | 0.13               | 0.03       |
| C <sub>2</sub> H <sub>4</sub> O@NH <sub>2</sub> -<br>Cu <sub>1</sub> /Pd(111) | 0.22                | 0.18               | 0.04       |
| C <sub>3</sub> H <sub>4</sub> O@NH <sub>2</sub> -<br>Cu <sub>1</sub> /Pd(111) | 0.29                | 0.24               | 0.05       |
| C <sub>3</sub> H <sub>6</sub> O@NH <sub>2</sub> -<br>Cu <sub>1</sub> /Pd(111) | 0.23                | 0.20               | 0.03       |

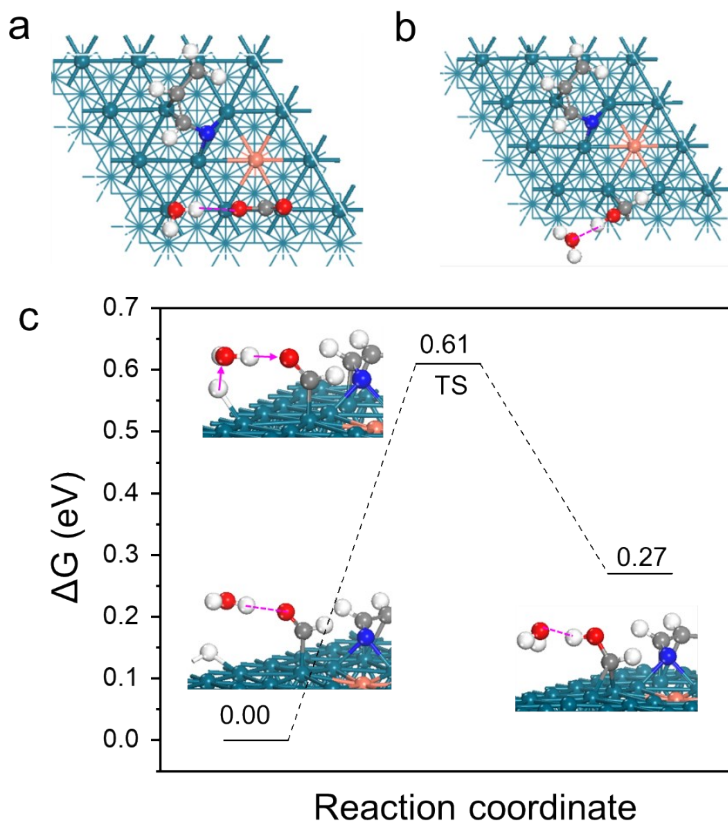

Fig. S14 The effect of H<sub>2</sub>O on (a) CO<sub>2</sub> adsorption energy, (b) HCOH intermediates, (c) the energy barriers of rate-determining step on C<sub>3</sub>H<sub>4</sub>O@NH<sub>2</sub>-Cu<sub>1</sub>/Pd(111). The red dotted lines represented hydrogen bonds.

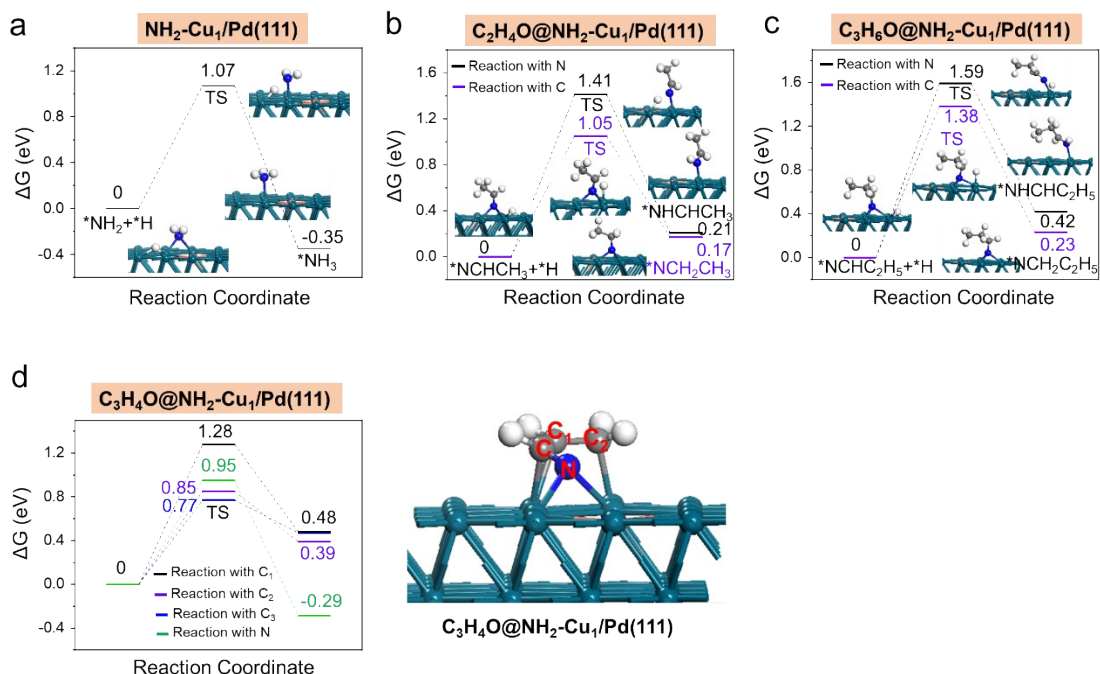

Fig. S15 The free energy profiles for H reactions with groups. (a) The reaction of H with -NH<sub>2</sub> generating -NH<sub>3</sub> over NH<sub>2</sub>-Cu<sub>1</sub>/Pd(111). (b) The reaction of H with the N atoms (black routes) and C atoms (purple routes) of C=N double bonds over C<sub>2</sub>H<sub>4</sub>O@NH<sub>2</sub>-Cu<sub>1</sub>/Pd(111). (c) The reaction of H with the N atoms (black routes) and C atoms (purple routes) of C=N double bonds over C<sub>3</sub>H<sub>6</sub>O@NH<sub>2</sub>-Cu<sub>1</sub>/Pd(111). (d) The free energy profiles for H reactions with C=N and C=C double bonds over C<sub>3</sub>H<sub>4</sub>O@NH<sub>2</sub>-Cu<sub>1</sub>/Pd(111). The green, black, purple, and blue routes represented that the H reacted with N, C, C<sub>1</sub>, and C<sub>2</sub> atoms, respectively. TS represented the transition state. The cyan, grey, white, blue, and yellow spheres represented Pd, C, H, N, and Cu atoms, respectively.

Table S10 The free energy barriers (eV) for H reactions with functional groups and CO<sub>2</sub> over structures. RDS represented the rate-determining step for CO<sub>2</sub> hydrogenation to CH<sub>3</sub>OH on various structures.

| Structures                                                                    | NH <sub>2</sub> | C=N double bond |      | C=C double bond |                | RDS  |
|-------------------------------------------------------------------------------|-----------------|-----------------|------|-----------------|----------------|------|
|                                                                               |                 | C               | N    | C <sub>1</sub>  | C <sub>2</sub> |      |
| NH <sub>2</sub> -Cu <sub>1</sub> /Pd(111)                                     | 1.07            | —               | —    | —               | —              | 0.88 |
| C <sub>2</sub> H <sub>4</sub> O@NH <sub>2</sub> -<br>Cu <sub>1</sub> /Pd(111) | —               | 1.05            | 1.41 | —               | —              | 0.79 |
| C <sub>3</sub> H <sub>4</sub> O@NH <sub>2</sub> -<br>Cu <sub>1</sub> /Pd(111) | —               | 1.28            | 0.95 | 0.85            | 0.77           | 0.66 |
| C <sub>3</sub> H <sub>6</sub> O@NH <sub>2</sub> -<br>Cu <sub>1</sub> /Pd(111) | —               | 1.38            | 1.59 | —               | —              | 0.86 |

## The effect of support on catalytic performance

Supports can affect the activity, selectivity, and yield of products by regulating the active site, adsorption strength, coordination environment, binding energy and the chemical state of metal species, etc.<sup>S12-S14</sup> For example, Bai et al. investigated the influence of supports ( $\text{SiO}_2$ ,  $\text{CeO}_2$ ,  $\text{Al}_2\text{O}_3$  and  $\text{P}_{25}$ ) on the catalytic performance of  $\text{Pd}_2\text{Cu}$  NPs. They found that  $\text{Pd}_2\text{Cu}$  NPs/ $\text{CeO}_2$  showed the highest  $\text{CH}_3\text{OH}$  yield due to  $\text{CeO}_2$  enhancing the activity of Cu.  $\text{Pd}_2\text{Cu}$  NPs/ $\text{P}_{25}$  had the highest selectivity for  $\text{C}_2\text{H}_5\text{OH}$  owing to oxygen vacancies on  $\text{P}_{25}$ .<sup>S15</sup> In addition, Jiang et al. reported that the formation rate of  $\text{CH}_3\text{OH}$  over supported Pd-Cu catalysts decreased in the following order: amorphous silica > SBA-15 > MCM-41 > MSU-F. Among the four supports, the amorphous silica supported Pd-Cu catalysts exhibited the highest selectivity for  $\text{CH}_3\text{OH}$ .<sup>S16</sup>

Furthermore, we used DFT calculations to explore the effect of support on  $\text{CO}_2$  adsorption in the revised manuscript. During the study,  $\text{SiO}_2$  was chosen as the support for Pd-Cu nanoparticles ( $\text{PdCu}$  NPs/ $\text{SiO}_2$ ) to determine the adsorption energy of  $\text{CO}_2$ . As shown in Fig.S16†, the adsorption energy of  $\text{CO}_2$  on  $\text{PdCu}$  NPs/ $\text{SiO}_2$  was -0.97 eV, which was stronger than that on  $\text{Cu}_1/\text{Pd}(111)$  (-0.12 eV). The result indicated that the support had a significant effect on  $\text{CO}_2$  adsorption through tuning the electronic structure, which was consistent with previous studies.<sup>S17</sup>

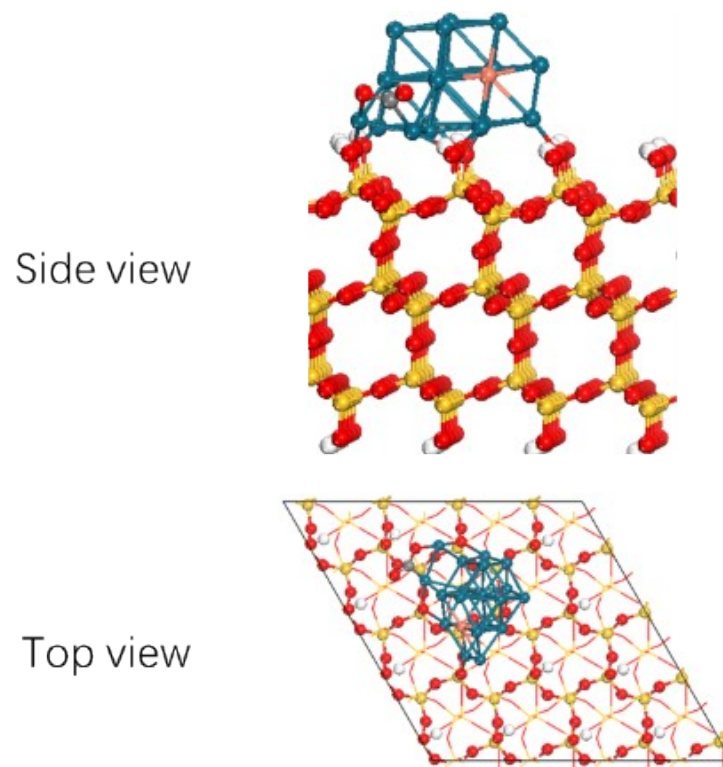

Fig. S16 The adsorption of CO<sub>2</sub> on PdCu NPs/SiO<sub>2</sub>. The cyan, grey, white, red, orange, and yellow spheres represented Pd, C, H, O, Si and Cu atoms, respectively.

## References

- S1 C. Stegelmann, A. Andreasen, C. T. Campbell, *J. Am. Chem. Soc.*, 2009, **131**, 8077-8082.
- S2 C. T. Campbell, *ACS Catal.*, 2017, **7**, 2770-2779.
- S3 S. Kozuch, S. Shaik, *J. Phys. Chem. A*, 2008, **112**, 6032-6041.
- S4 S. Kattel, P.J. Ramírez, J.G. Chen, J.A. Rodriguez, P. Liu, *Science*, 2017, **355**, 1296-1299.
- S5 Q. Tang, Z. Shen, C.K. Russell, M. Fan, *J. Phys. Chem. C*, 2018, **122**, 315-330.
- S6 S. Kattel, B. Yan, Y. Yang, J.G. Chen, P. Liu, *J. Am. Chem. Soc.*, 2016, **138**, 12440-12450.
- S7 Y. Peng, L. Wang, Q. Luo, Y. Cao, Y. Dai, Z. Li, H. Li, X. Zheng, W. Yan, J. Yang, J. Zeng, *Chem*, 2018, **4**, 613-625.
- S8 J. Ye, C. Liu, D. Mei, Q. Ge, *ACS Catal.*, 2013, **3**, 1296-1306.
- S9 J. Liu, Q. Ke, X. Chen, *J. Mater. Sci.*, 2021, **56**, 3790-3803.
- S10 L. Liu, H. Yao, Z. Jiang, T. Fang, *Appl. Surf. Sci.*, 2018, **451**, 333-345.
- S11 L. Liu, F. Fan, Z. Jiang, X. Gao, J. Wei, T. Fang, *J. Phys. Chem. C*, 2017, **121**, 26287-26299.
- S12 S. Li, X. Yao, Y. Chen, *Angew. Chem. Int. Ed*, 2017, **56**, 10761-10765.
- S13 Z. Li, R. Wu, L. Zhao, X. X. Wei, J. J. Wang, J. S. Chen, T. R. Zhang, *Nano Res.*, 2021, **14**, 3795-3809.
- S14 J. Y. Park, L. R. Baker, G. A. Somorjai, *Chem. Rev.*, 2015, **115**, 2781-2817.
- S15 S. X. Bai, Q. Shao, P. T. Wang, Q. G. Dai, X. Y. Wang, X. Q. Huang, *J. Am. Chem. Soc.*, 2017, **139**, 20, 6827-6830
- S16 X. Jiang, N. Koizumi, X. Guo, *Appl. Catal. B: Environ.*, 2015, **170**, 173-185.
- S17 F. Lin, X. Jiang, N. Boreriboon, Z. H. Wang, C. S. Song, K. F. Cen, *Appl. Catal. A: Gen.*, 2019, **585**, 117210.
